# Supplementary material for: A point-of-care diagnostics logic detector based on glucose oxidase immobilized lanthanide functionalized metal–organic frameworks
Source: Royal Society of Chemistry journal article supplement (doi:10.1039/c9nr06475c), 2019-01-01
Supplement: c9nr06475c1.pdf [file c9nr06475c1.pdf]

## Supporting information

### **A Point-of-care Diagnostics Logic Detector Based on Glucose Oxidase Immobilized Lanthanide Functionalized Metal-organic Frameworks**

Yu Zhang<sup>a</sup> and Bing Yan\*<sup>a,b</sup>

<sup>a</sup> *Shanghai Key Lab of Chemical Assessment and Sustainability, School of Chemical Science and Engineering, Tongji University, Siping Road 1239, Shanghai 200092, China*

<sup>b</sup> *School of Materials Science and Engineering, Liaocheng University, Liaocheng 252059, China*

\* Corresponding author Email addresses: [byan@tongji.edu.cn](mailto:byan@tongji.edu.cn) (Bing Yan)

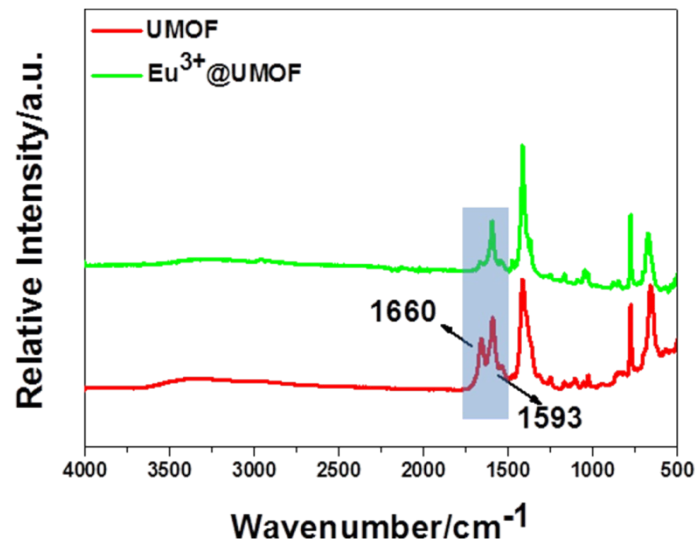

**Figure S1** FT-IR spectra of UMOF and  $\text{Eu}^{3+}$ @UMOF.

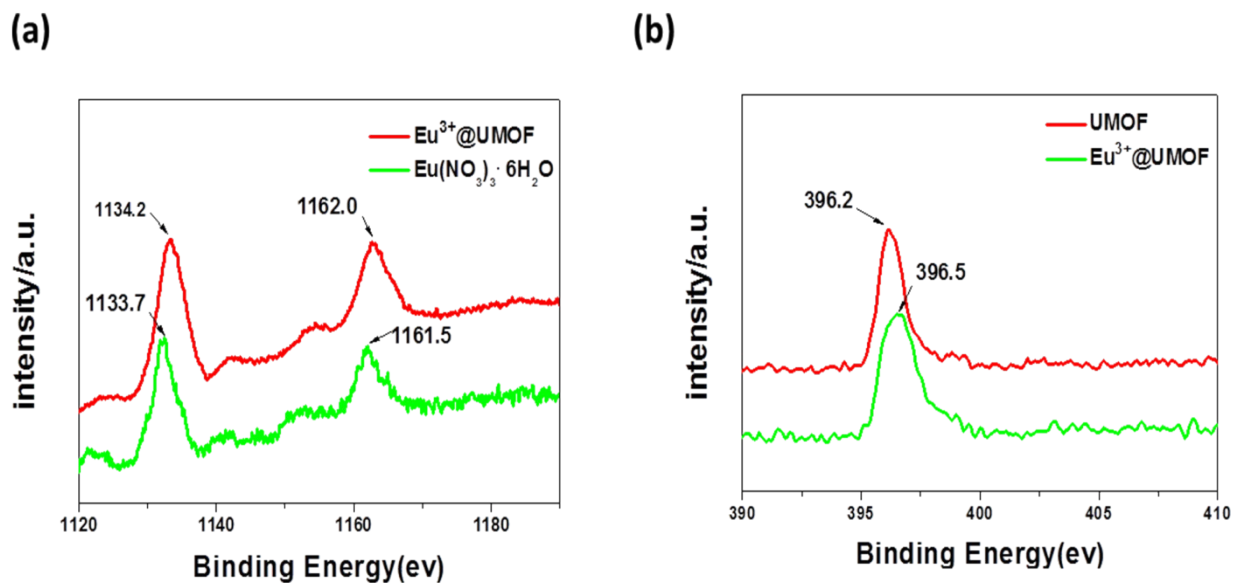

**Figure S2** Eu 3d XPS spectra of  $\text{Eu}^{3+}$ @UMOF and  $\text{Eu}(\text{NO}_3)_3 \cdot 6\text{H}_2\text{O}$ ; N 1s XPS spectra of UMOF and  $\text{Eu}^{3+}$ @UMOF.

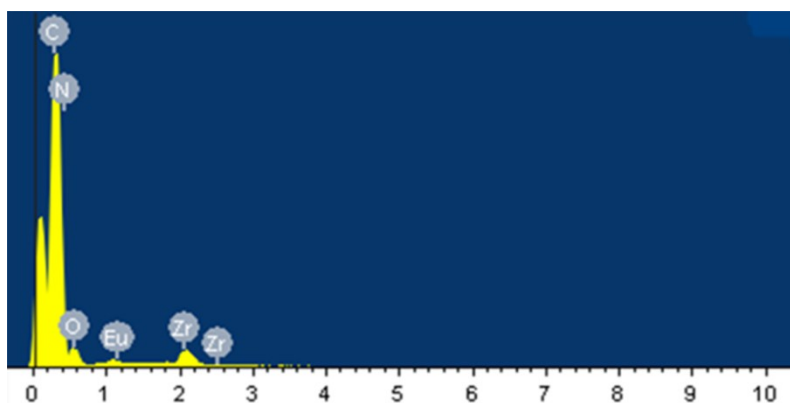

**Figure S3** The energy dispersive X-ray spectroscopy (EDX) of  $\text{Eu}^{3+}@$ UMOF.

(a)

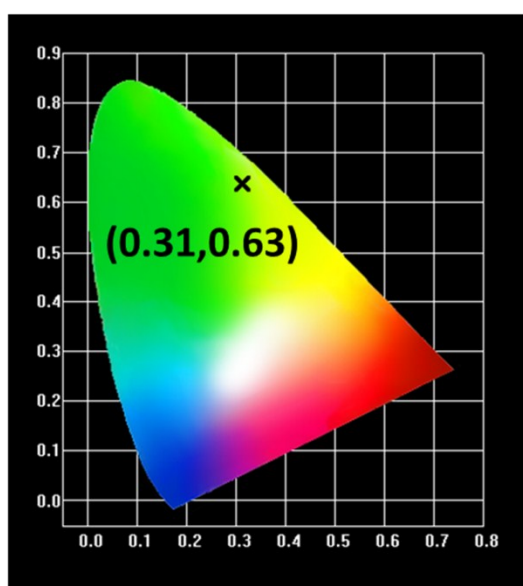

(b)

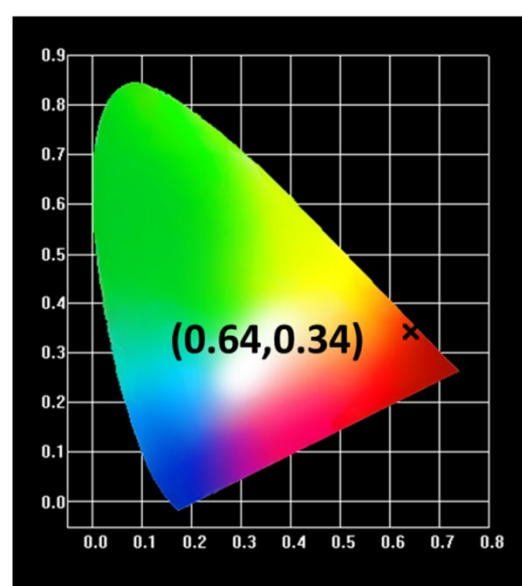

**Figure S4** The corresponding CIE chromaticity diagram of (a) UMOF and (b)  $\text{Eu}^{3+}@$ UMOF.

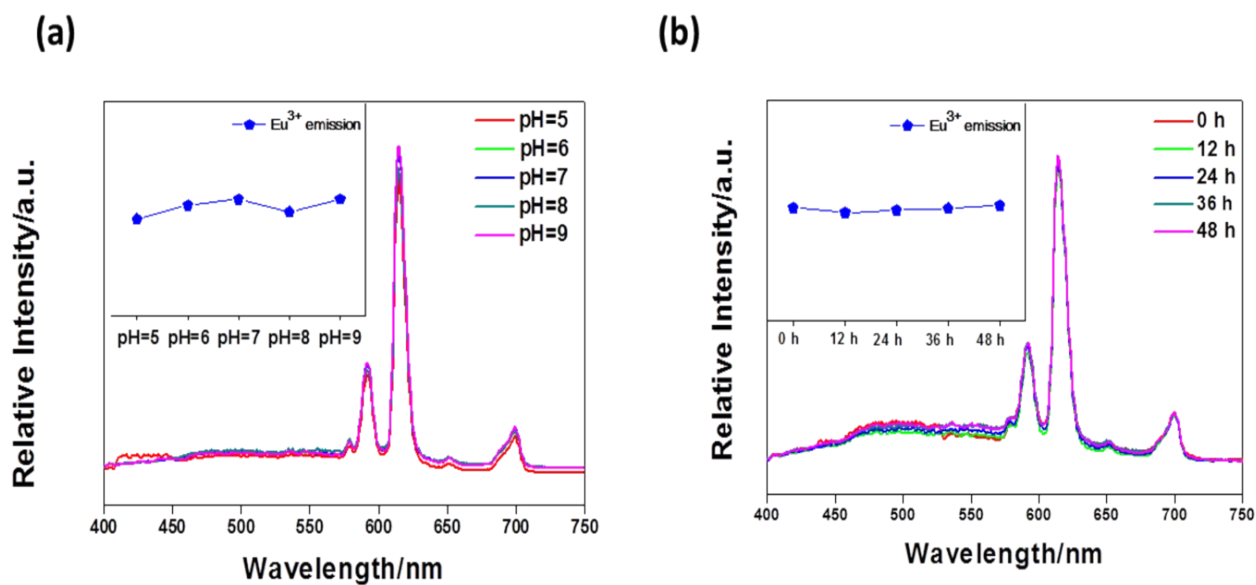

**Figure S5** (a) The fluorescence stability of  $\text{Eu}^{3+}@$ UMOF in different PH (5-9) solutions; (b) hour to hour fluorescence stability of  $\text{Eu}^{3+}@$ UMOF.

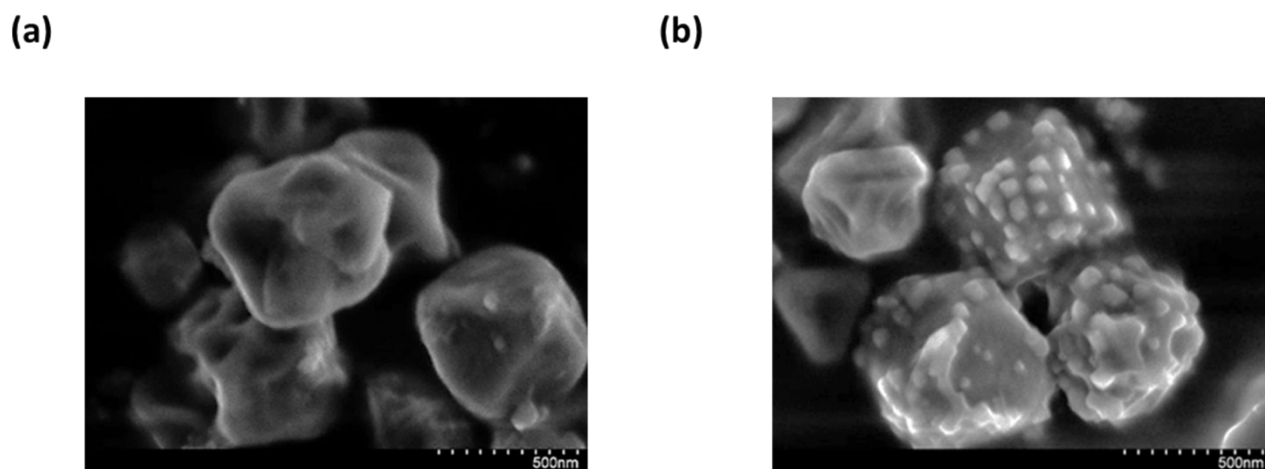

**Figure S6** The SEM images of (a)  $\text{Eu}^{3+}@$ UMOF and (b)  $\text{GOx-Eu}^{3+}@$ UMOF.

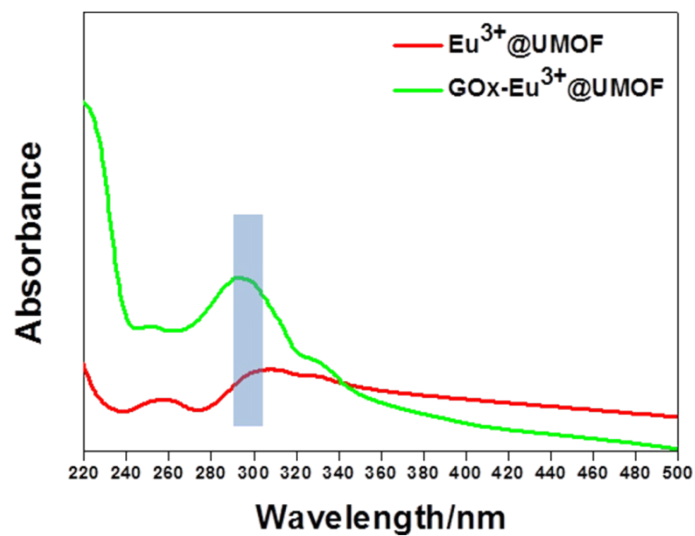

**Figure S7** The UV-vis spectra of  $\text{Eu}^{3+}@UMOF$  and  $\text{GOx-Eu}^{3+}@UMOF$ .

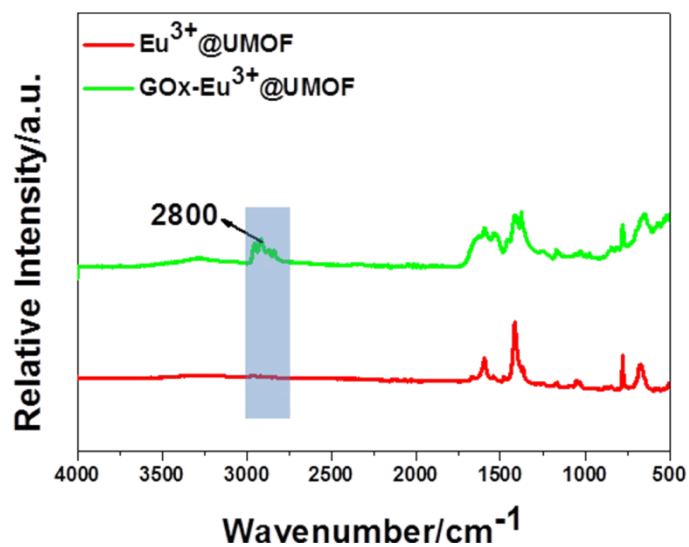

**Figure S8** FT-IR spectra of  $\text{Eu}^{3+}@UMOF$  and  $\text{GOx-Eu}^{3+}@UMOF$ .

(a)

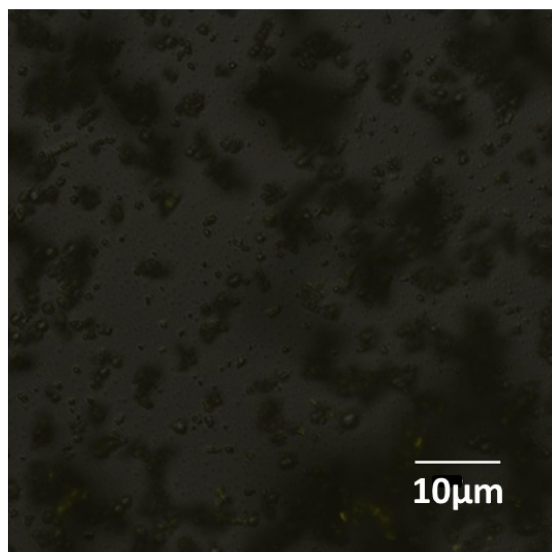

(b)

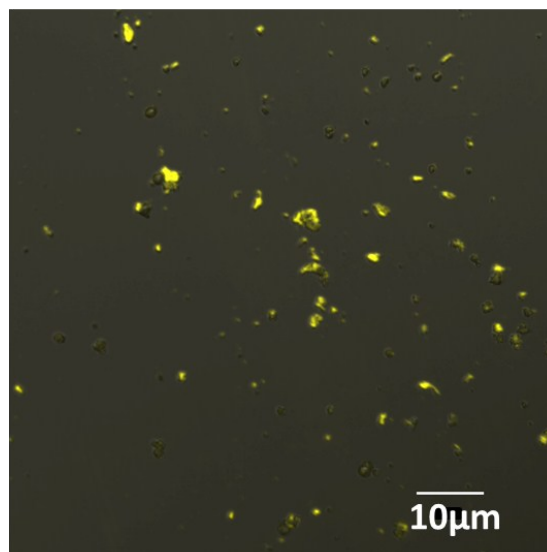

**Figure S9** Confocal microscopy images of (a) GOx-Eu<sup>3+</sup>@UMOF; (b) RhB-GOx-Eu<sup>3+</sup>@UMOF

(a)

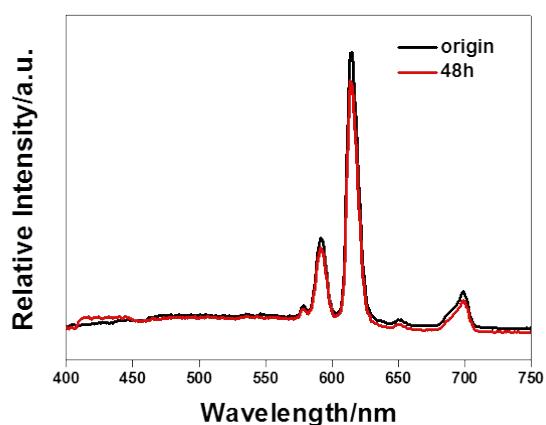

(b)

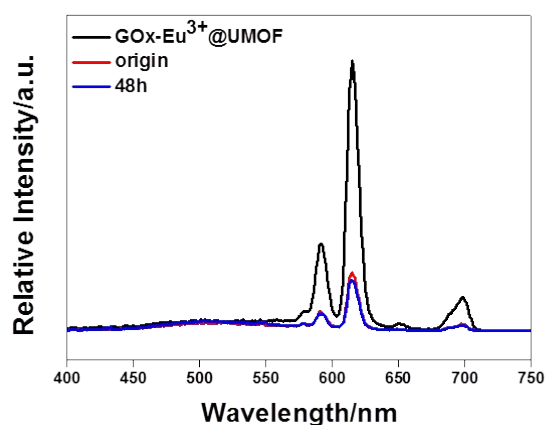

**Figure S10** a) Luminescence spectra of GOx-Eu<sup>3+</sup>@UMOF and GOx-Eu<sup>3+</sup>@UMOF when stored for 48 hours at room temperature; b) Luminescence spectra of the original GOx-Eu<sup>3+</sup>@UMOF, GOx-Eu<sup>3+</sup>@UMOF immersing into Glu and GOx-Eu<sup>3+</sup>@UMOF immersing into Glu after stored for 48 hours at room temperature.

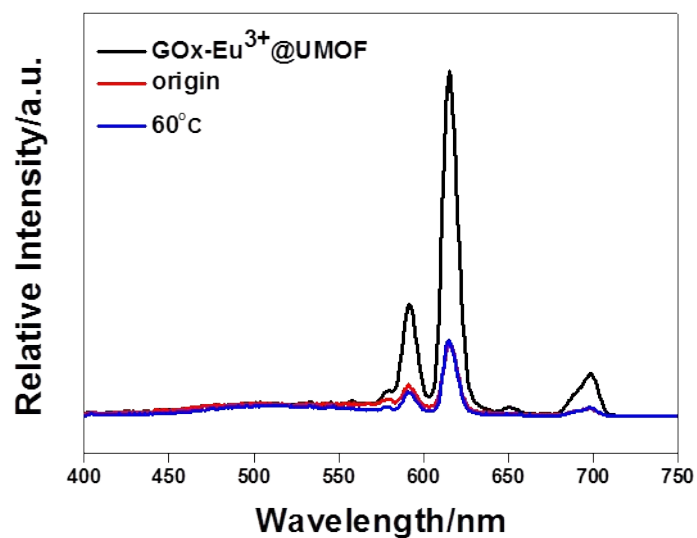

**Figure S11** Luminescence spectra of the original GOx-Eu<sup>3+</sup>@UMOF, GOx-Eu<sup>3+</sup>@UMOF immersing into Glu and GOx-Eu<sup>3+</sup>@UMOF immersing into Glu after stored in in an oven at 60 °C.

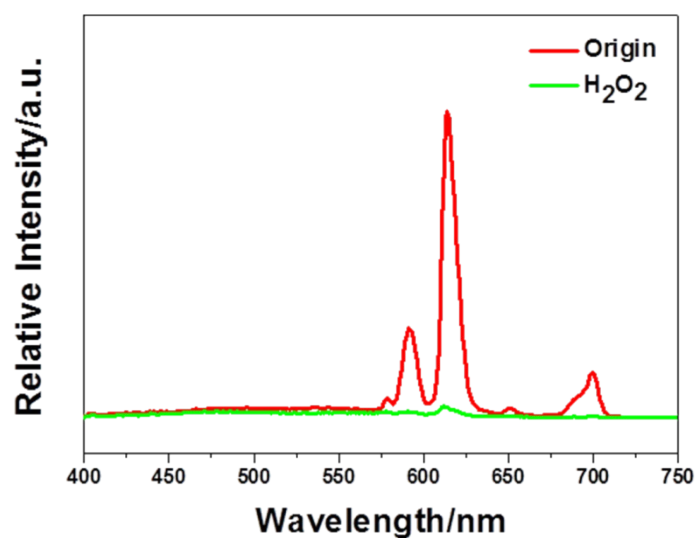

**Figure S12** Luminescence spectra of GOx-Eu<sup>3+</sup>@UMOF when immersing in H<sub>2</sub>O (red) and H<sub>2</sub>O<sub>2</sub> (green).

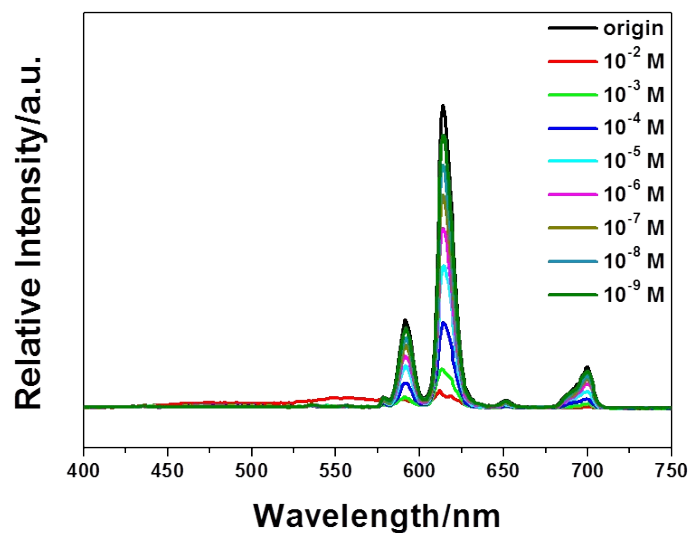

**Figure S13** The luminescent intensity of  $\text{Eu}^{3+}@UMOF$  toward different concentrations of  $\text{H}_2\text{O}_2$ .

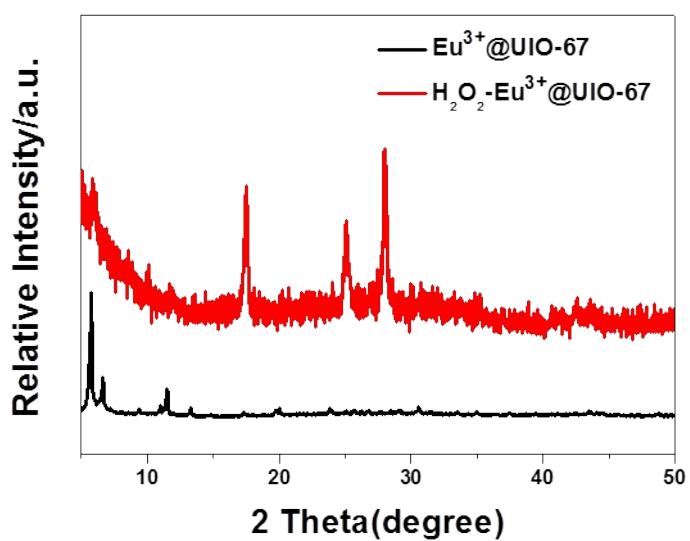

**Figure S14** The PXRD patterns of  $\text{Eu}^{3+}@UMOF$  and  $\text{Eu}^{3+}@UMOF$  immersed into  $\text{H}_2\text{O}_2$ .



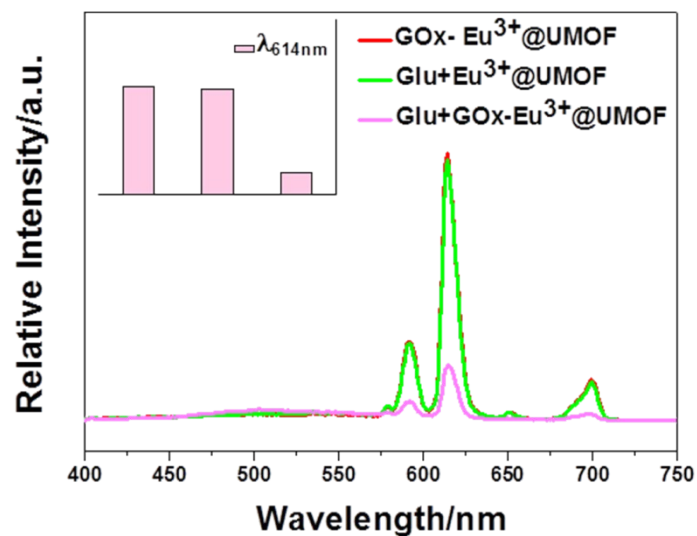

**Figure S15** Luminescence spectra of (a) GOx-Eu<sup>3+</sup>@UMOF; (b) Eu<sup>3+</sup>@UMOF after immersing into Glu solutions; (c) GOx-Eu<sup>3+</sup>@UMOF after immersing into Glu solutions. The insert is the histogram of λ<sub>614nm</sub>.

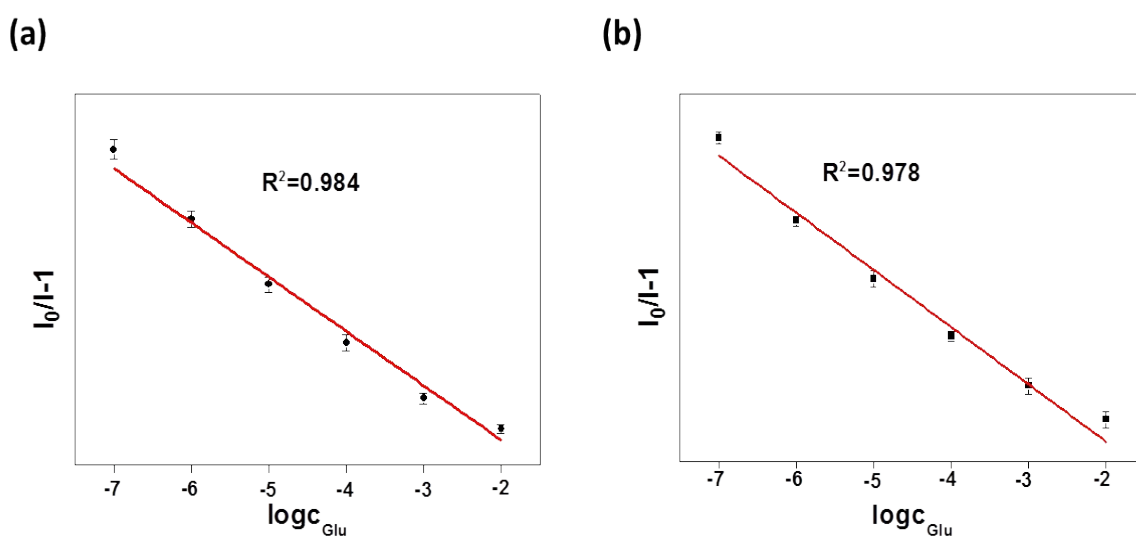

**Figure S16** Linear curve of the luminescent intensity of GOx-Eu<sup>3+</sup>@UMOF toward different concentrations of Glu in (a) urine and (b) serum.

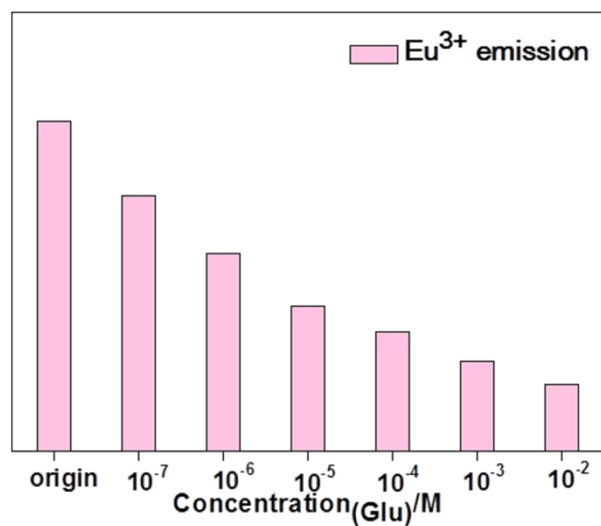

**Figure S17** The column diagram of the fluorescence intensity of GOx-Eu<sup>3+</sup>@UMOF after immersing into different concentrations of Glu in urine.

**Table S1** The weight percentage and atomic percentage of all elements in Eu<sup>3+</sup>@UMOF and GOx-Eu<sup>3+</sup>@UMOF determined by energy dispersive X-ray spectroscopy (EDX).

(a)

| Materials              | Element | Weight% | Atomic% |
|------------------------|---------|---------|---------|
| Eu <sup>3+</sup> @UMOF | C       | 49.19   | 56.03   |
|                        | N       | 36.65   | 35.79   |
|                        | O       | 8.70    | 7.44    |
|                        | Zr      | 4.04    | 0.61    |
|                        | Eu      | 1.42    | 0.13    |

(b)

| Materials                  | Element | Weight% | Atomic% |
|----------------------------|---------|---------|---------|
| GoX-Eu <sup>3+</sup> @UMOF | C       | 54.60   | 60.14   |
|                            | N       | 32.82   | 31.00   |
|                            | O       | 10.36   | 8.57    |
|                            | Zr      | 1.82    | 0.26    |
|                            | Eu      | 0.39    | 0.03    |

**Table S2** The GOx loading in repeated experiments.

| Times          | 1     | 2     | 3     | 4     | 5     | 6     | 7     | 8     |
|----------------|-------|-------|-------|-------|-------|-------|-------|-------|
| GOx loading(%) | 54.95 | 55.65 | 53.25 | 54.05 | 53.69 | 55.68 | 54.80 | 54.58 |

**Table S3** The zeta potential of UMOF, Eu<sup>3+</sup>@ and GOx-Eu<sup>3+</sup>@UMOF.

| Materials                  | Zeta potential (mv) |
|----------------------------|---------------------|
| UMOF                       | -3.87mv             |
| Eu <sup>3+</sup> @UMOF     | -3.95mv             |
| Gox-Eu <sup>3+</sup> @UMOF | -5.76mv             |

**Table S4** The kinetic parameters of GOx-Eu<sup>3+</sup>@UMOF.

|                            | K <sub>m</sub> /mM | V <sub>max</sub> / $\mu$ M S <sup>-1</sup> |
|----------------------------|--------------------|--------------------------------------------|
| Gox-Eu <sup>3+</sup> @UMOF | 1.75               | 0.23                                       |

**Table S5** The truth table of Gate 1, Gate 2 and Gate 3

| Gate 1                        |                |          | (b) Gate 2                   |                |          |         | (c) Gate 3             |                |          |         |
|-------------------------------|----------------|----------|------------------------------|----------------|----------|---------|------------------------|----------------|----------|---------|
| Input 1                       |                | Output 1 | Input 2                      |                | Output 2 |         | Input 3                |                | Output 3 |         |
| C <sub>Glu</sub> >0.1 $\mu$ M | $\lambda_{ex}$ | Light 1  | C <sub>Glu</sub> >10 $\mu$ M | $\lambda_{ex}$ | Output 1 | Light 2 | C <sub>Glu</sub> >10mM | $\lambda_{ex}$ | Output 2 | Light 3 |
| 1                             | 0              | 0        | 1                            | 0              | 0        | 0       | 1                      | 0              | 0        | 0       |
| 1                             | 1              | 0        | 1                            | 1              | 0        | 0       | 1                      | 1              | 0        | 0       |
| 0                             | 0              | 0        | 0                            | 0              | 0        | 0       | 0                      | 0              | 0        | 0       |
| 0                             | 1              | 1        | 0                            | 1              | 0        | 1       | 0                      | 1              | 0        | 1       |
|                               |                |          | 1                            | 0              | 1        | 0       | 1                      | 0              | 1        | 0       |
|                               |                |          | 1                            | 1              | 1        | 0       | 1                      | 1              | 1        | 0       |
|                               |                |          | 0                            | 0              | 1        | 0       | 0                      | 0              | 1        | 0       |
|                               |                |          | 0                            | 1              | 1        | 0       | 0                      | 1              | 1        | 0       |
